# Supplementary material for: Cytoskeletal stiffening in synthetic hydrogels
Source: PubMed Central journal article supplement (PMC6363731; doi:10.1038/s41467-019-08569-4), 2019-02-05
Supplement: 41467_2019_8569_MOESM1_ESM.pdf [file 41467_2019_8569_MOESM1_ESM.pdf]

## Supplementary Information

### Cytoskeletal stiffening in synthetic hydrogels

Paula de Almeida et al.

## Supplementary Methods

**Synthesis of dibenzocyclooctyne-functionalized acrylamide.** The dibenzocyclooctyne-amine (12 mg, 0.044 mmol, Click Chemistry Tools) was dissolved in dry THF (10 mL) and acryloyl chloride (13.4  $\mu$ L, 0.13 mmol, Sigma Aldrich) with a drop of trimethylamine (JT Baker). The reaction mixture was stirred for two hours at room temperature after which the mixture was poured into ice water (50 mL). The aqueous mixture was extracted with dichloromethane ( $3 \times 50$  mL). The combined organic layers were washed with a 0.1 M HCl solution, dried with  $MgSO_4$  and the solvent was evaporated *in vacuo*. The resulting product was purified by precipitation in *n*-hexane and vacuum dried to yield 4.4 mg (30 %) as a yellow solid.  $^1H$ -NMR (Bruker Avance III, 400 MHz,  $CDCl_3$ ):  $\delta$  7.67 (d,  $J = 7.4$  Hz, 1H), 7.38 (m, 7H), 6.28 (s, 1H), 6.10 (m, 1H), 5.92 (m, 1H), 5.53 (d,  $J = 1.4$  Hz, 1H), 5.16 (d,  $J = 13.9$  Hz, 1H), 3.72 (m, H), 3.46 (m, 1H), 3.29 (m, 1H), 2.56 (m, 1H), 2.00 (m, 1H).  $^{13}C$  NMR (101 MHz,  $CDCl_3$ ):  $\delta$  170.09, 164.43, 151.55, 148.35, 132.38, 131.58, 129.53, 128.95, 128.25, 128.07, 127.73, 126.83, 124.92, 122.46, 121.44, 114.29, 108.02, 54.86, 48.60, 35.04, 34.12. FT-IR (ATR,  $cm^{-1}$ ) 3308, 2925, 1658, 1448, 1400, 1230, 754. MS ( $m/z$ ):  $[M]^+$  calcd. for  $C_{21}H_{18}N_2O_2$ , 330.4; found 331.1.

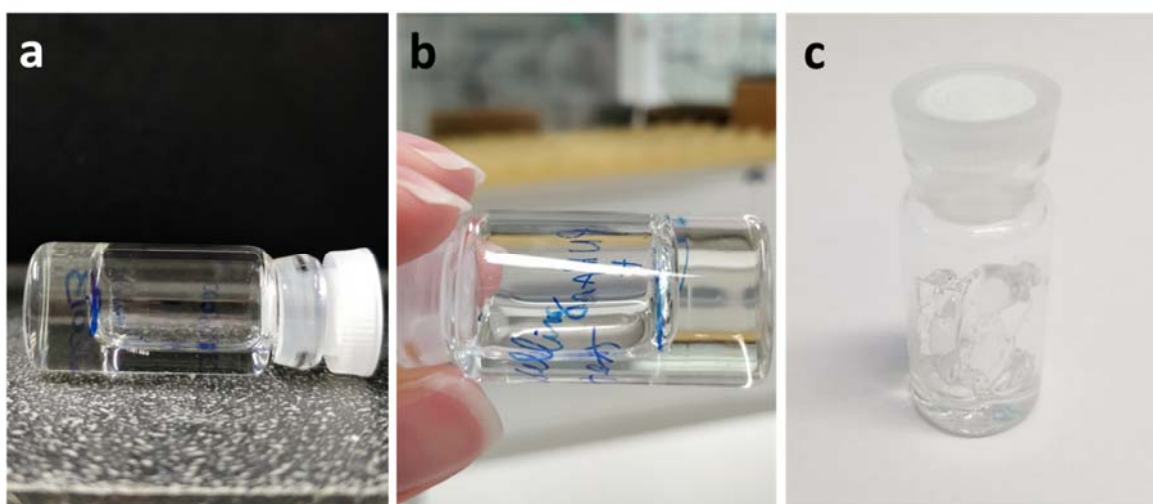

**Supplementary Figure 1 | Swelling behaviour of the gels.** (a) PIC (3 mg/mL) and (b) PIC/PNIPAM (3/40 mg mL<sup>-1</sup>) do not present visible swelling after 24 hours in contact with water, marked with the constant volume in comparison to the original gel (blue line). (c) The swelling of PNIPAM single-network (40 mg mL<sup>-1</sup>) in water is quite intense, causing the breakage of the gel.

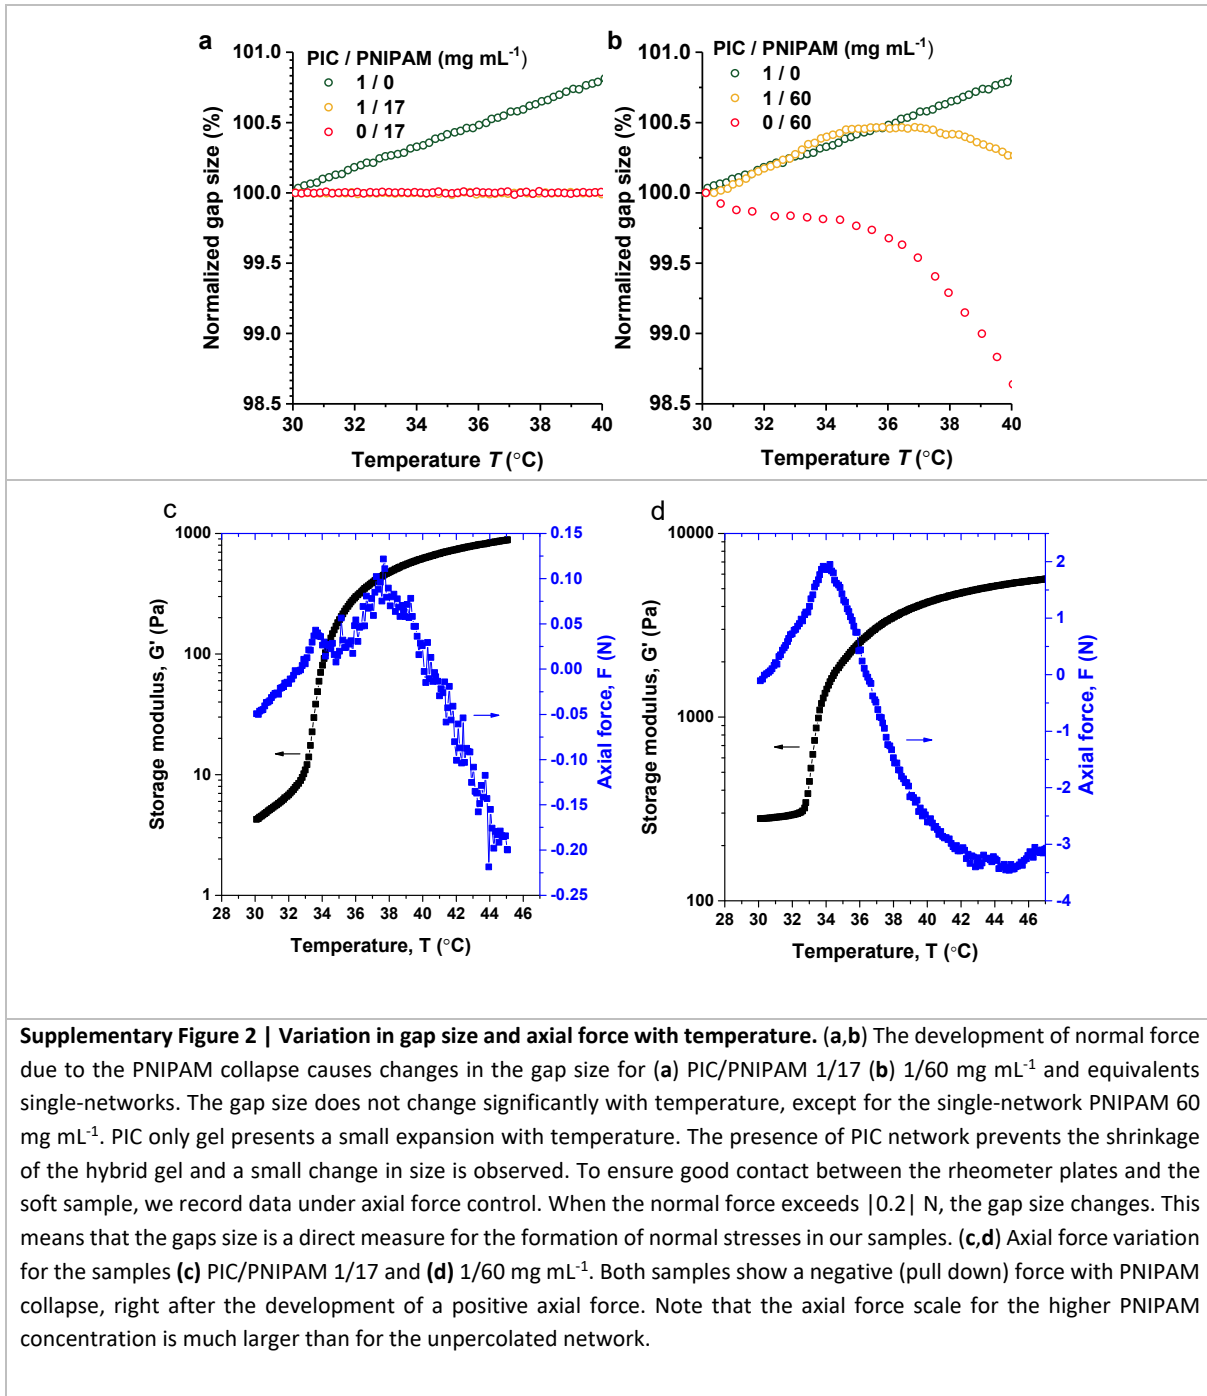

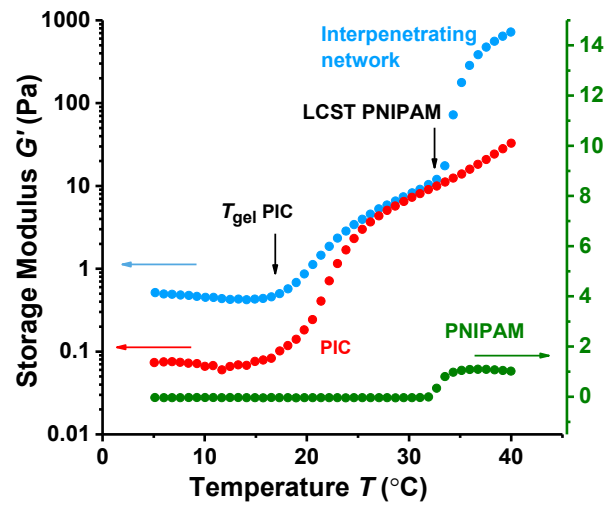

**Supplementary Figure 3 | Stiffening effect.** Mechanical properties of the IPN PIC/PNIPAM ( $1/17 \text{ mg mL}^{-1}$ ) with the PNIPAM data on a linear scale.

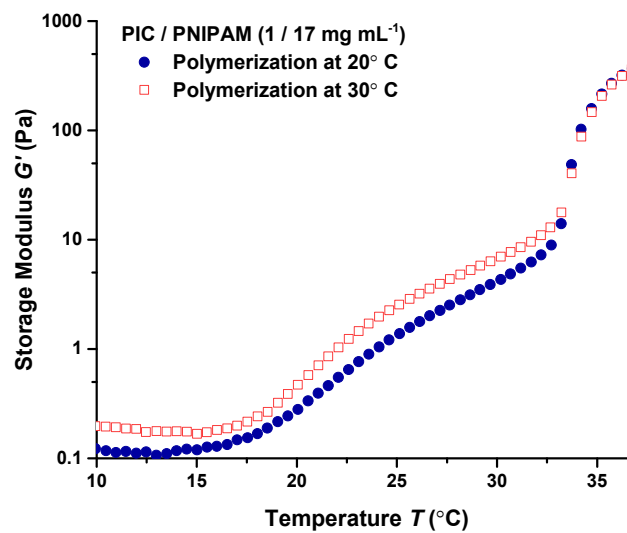

**Supplementary Figure 4 | Influence of polymerisation temperature.** Storage modulus as a function of temperature for PIC/PNIPAM double network hydrogels formed at  $T = 20$  (blue circles) and  $30 \text{ °C}$  (red squares).

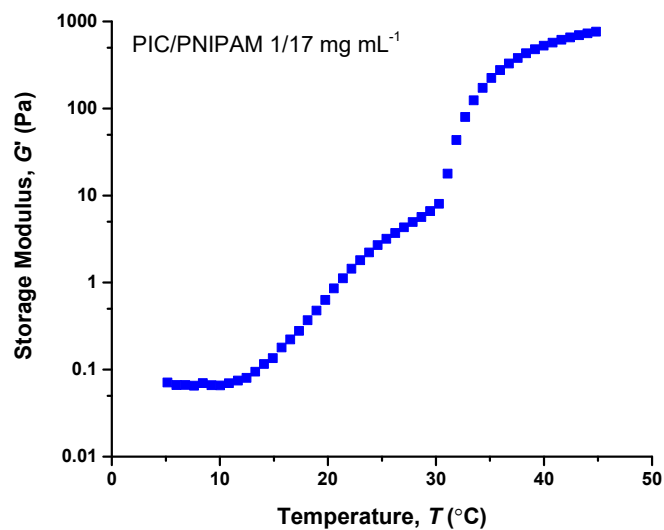

**Supplementary Figure 5 | Stiffening in serum-free media.** Storage modulus as a function of temperature for PIC/PNIPAM double-network hydrogel formed in serum-free media. Both  $T_{gel}$  of PIC and the LCST of PNIPAM shift a few degrees to lower temperature.

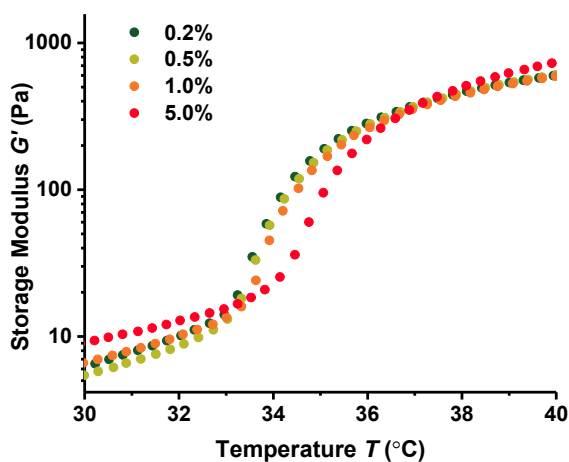

**Supplementary Figure 6 | Impact of the PNIPAM crosslinker concentration.** The crosslinker concentration  $c_{MBAA}$  does not affect the mechanical properties of the hybrid PIC/PNIPAM (1/17 mg mL<sup>-1</sup>). The crosslinker concentration is expressed in mol-% of NIPAM.

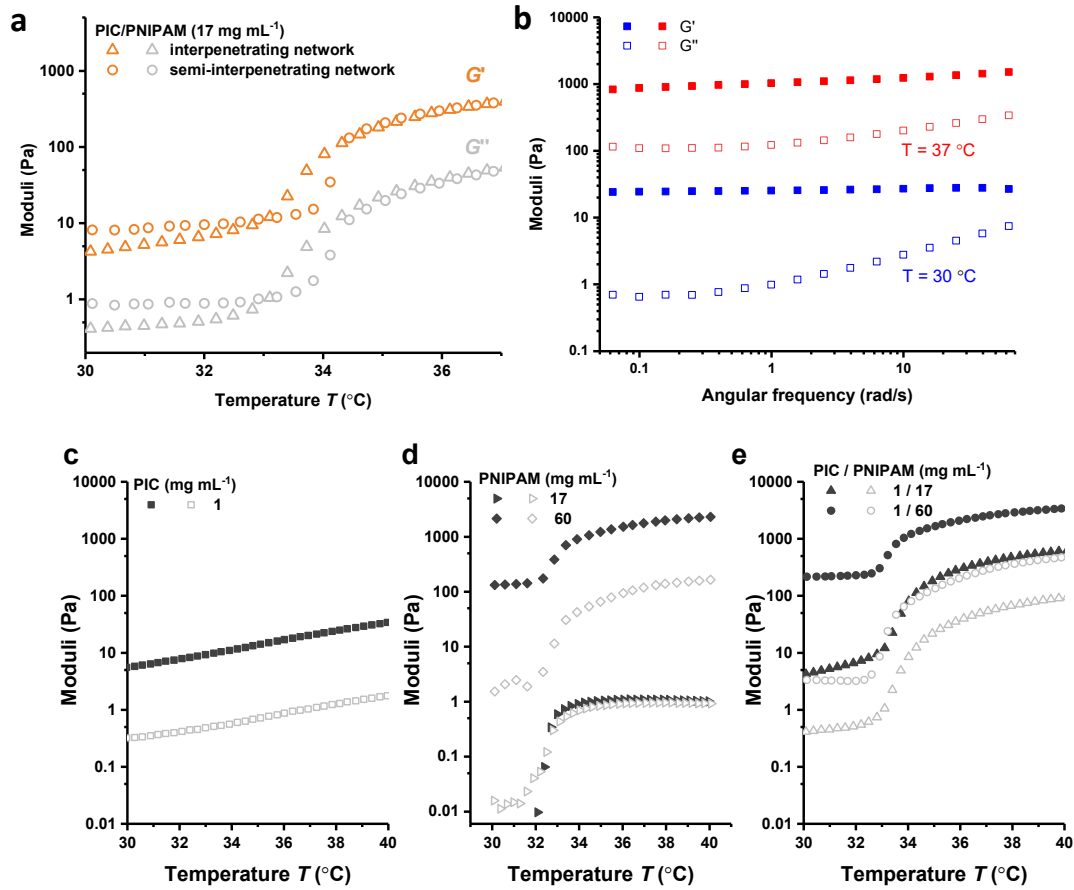

**Supplementary Figure 7 | Viscoelastic properties of IPNs and semi-IPNs.** (a) Storage and loss moduli as a function of temperature for the semi-IPN and IPN if PIC/PNIPAM (1/17 mg mL<sup>-1</sup>). The hydrogels behave as viscoelastic materials with  $G' \gg G''$ . (b) Storage and loss moduli for the PIC/PNIPAM 1/40 at temperatures below ( $T=30$  °C) and above ( $T=37$  °C) PNIPAM LCST. The loss modulus presents a small dependence with frequency. (c-e) Storage and loss moduli as a function of temperature for PIC only gels (c) PNIPAM-only gels (d) and PIC/PNIPAM IPNs (e) at different PNIPAM concentrations.

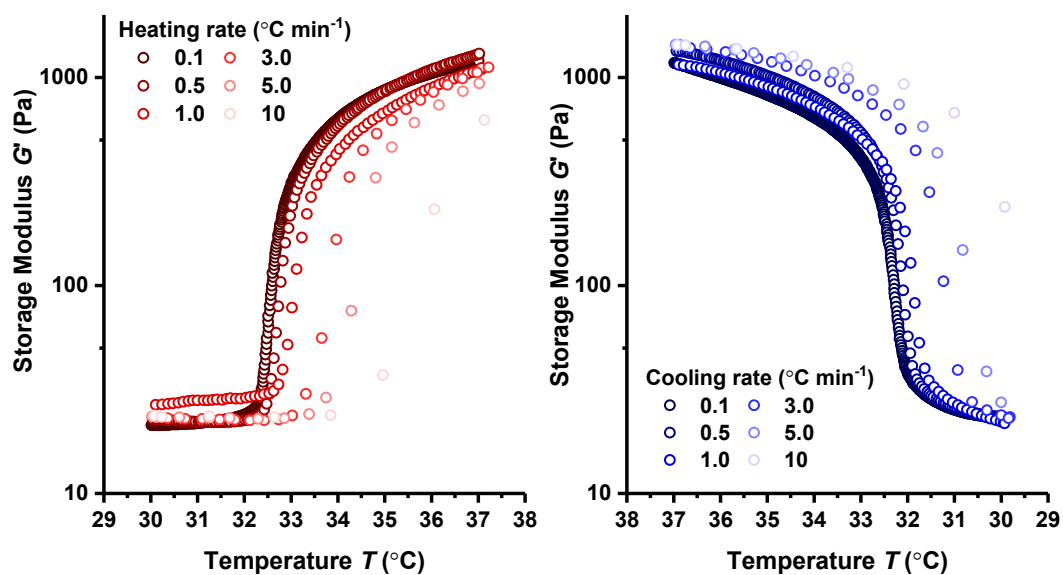

**Supplementary Figure 8 | Stiffening rates as a function of heating and cooling rates.** Effect of the heating/cooling rate to the stiffening effect (PIC/PNIPAM 1/40 mg mL<sup>-1</sup>). Up to 3 °C min<sup>-1</sup> the transition temperature is similar, although the effect is much sharper at slow rates. Faster rates are limited to the heat capacity of the systems, as seen for the late stiffening at rate 10 °C min<sup>-1</sup>.

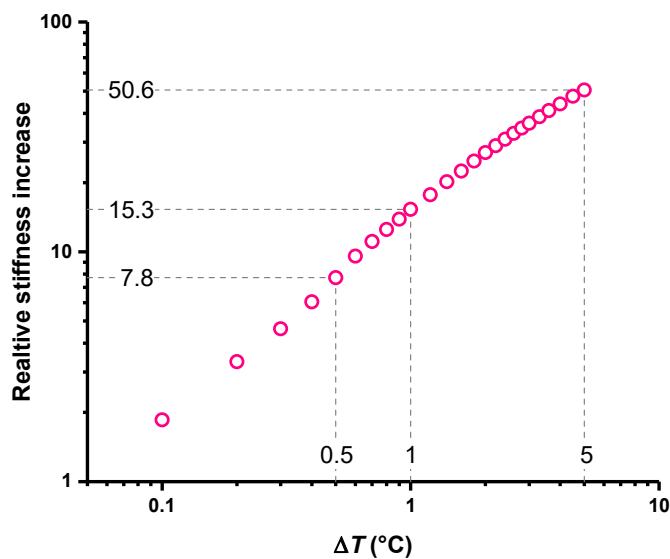

**Supplementary Figure 9 | Maximum achievable stiffness jump in a temperature window.** Relative stiffness increase, defined as  $G'_{T+\Delta T}/G'_T$  for a temperature window  $\Delta T$ , for the hydrogel PIC/PNIPAM 1/17 at a heating rate of 0.1 °C min<sup>-1</sup>. The hybrid IPN stiffens about 8 fold in 0.5 °C, 15 fold in 1 °C and 51 fold in 5 °C.

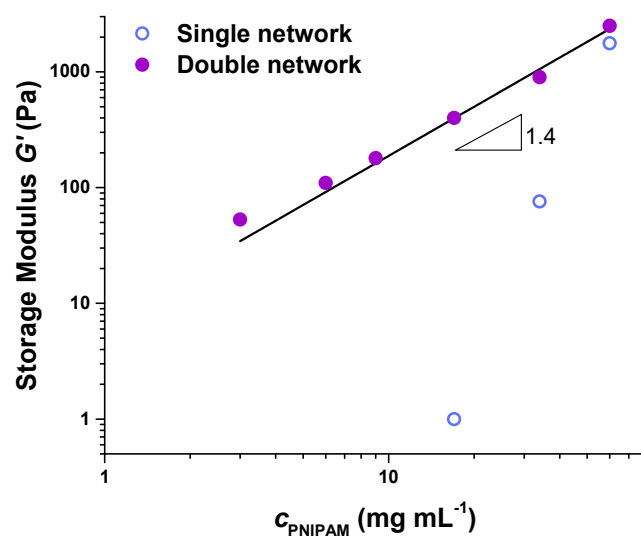

**Supplementary Figure 10 | Storage modulus dependence on the PNIPAM concentration.** Storage moduli  $G'$  of the IPNs ( $c_{PIC} = 1 \text{ mg mL}^{-1}$ , purple data) and PNIPAM only networks (open blue) as a function of the PNIPAM concentration beyond the LCST ( $= 37 \text{ }^\circ\text{C}$ ). The line is a power law fit:  $G' \propto c_{PNIPAM}^{1.4}$  for the hybrids. Single networks can only be measured for  $c_{PNIPAM} \geq 17 \text{ mg mL}^{-1}$ . Single and hybrid networks with  $c_{PNIPAM} = 60 \text{ mg mL}^{-1}$  show similar  $G'$ . Beyond this concentration, the mechanics are dominated by the PNIPAM network.

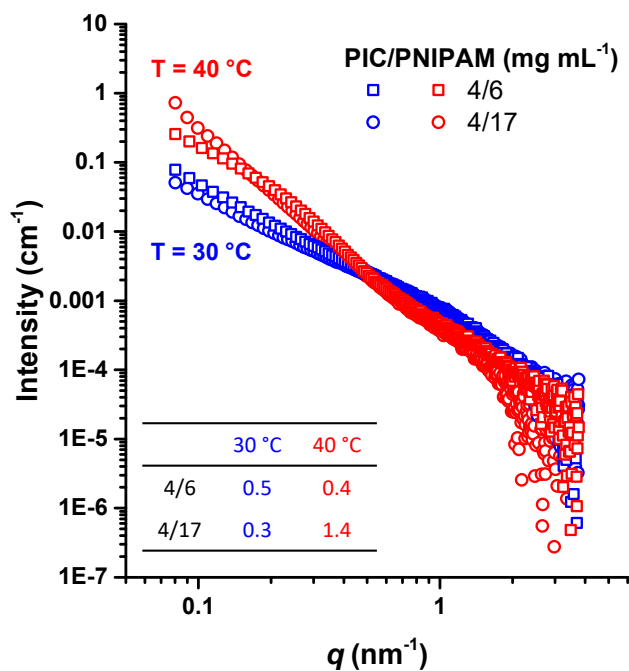

**Supplementary Figure 11 | Small angle X-ray scattering of PIC/PNIPAM hybrid hydrogels.** SAXS curves with PIC/PNIPAM concentrations of 4/6 (squares) and 4/17 (circles)  $\text{mg mL}^{-1}$  at  $T = 30$  and  $40 \text{ }^\circ\text{C}$ . The profiles allow a clearer visualization of the large increase in the scattering intensity at low scattering angles  $q$ . The fitted  $l_0$  values of the correlation length model are depicted in the inset.



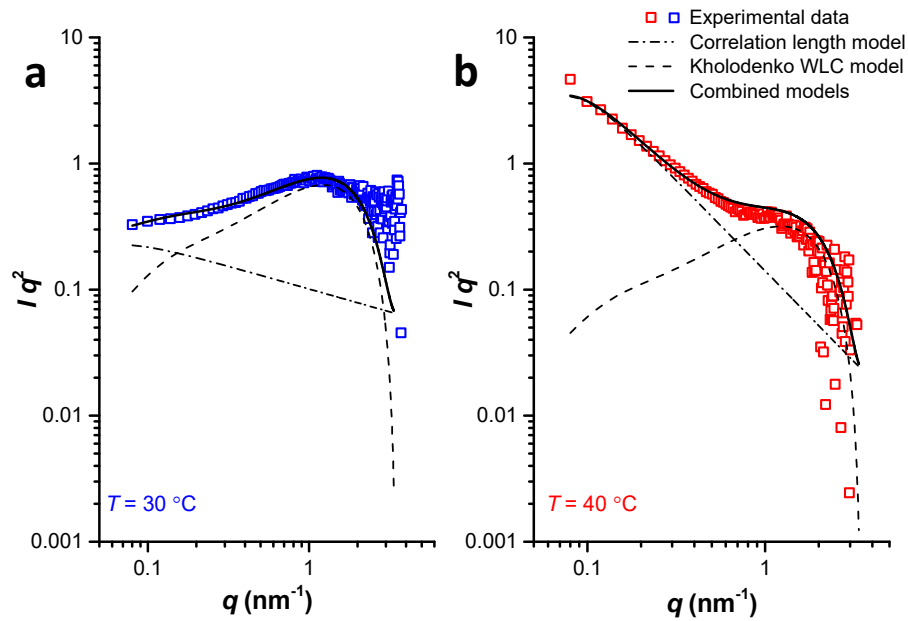

**Supplementary Figure 12 | Kratky analysis of the scattering data.**  $Iq^2$  as a function of  $q$  for the PIC/PNIPAM 4/17  $\text{mg mL}^{-1}$  at  $T = 30\text{ }^\circ\text{C}$  (a) and  $T = 40\text{ }^\circ\text{C}$  (b). The individual contribution of the correlation length model (dash-dot line) and Kholodenko worm-like chain model (dashed line) are shown.

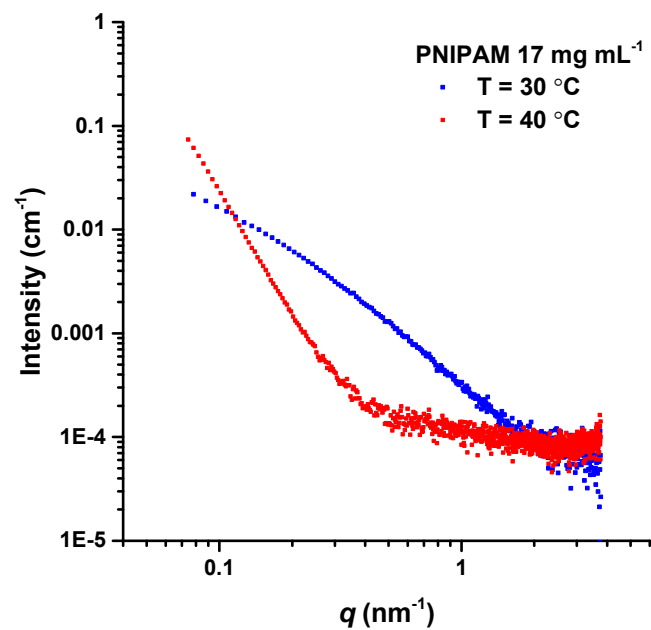

**Supplementary Figure 13 | Small angle X-ray scattering of PNIPAM networks.** Scattering profile of PNIPAM ( $17\text{ mg mL}^{-1}$ ) at  $T = 30\text{ }^\circ\text{C}$  and  $T = 40\text{ }^\circ\text{C}$ . At low  $q$  values, the scattering intensity for the PNIPAM network is much smaller in comparison to the hybrid hydrogels.

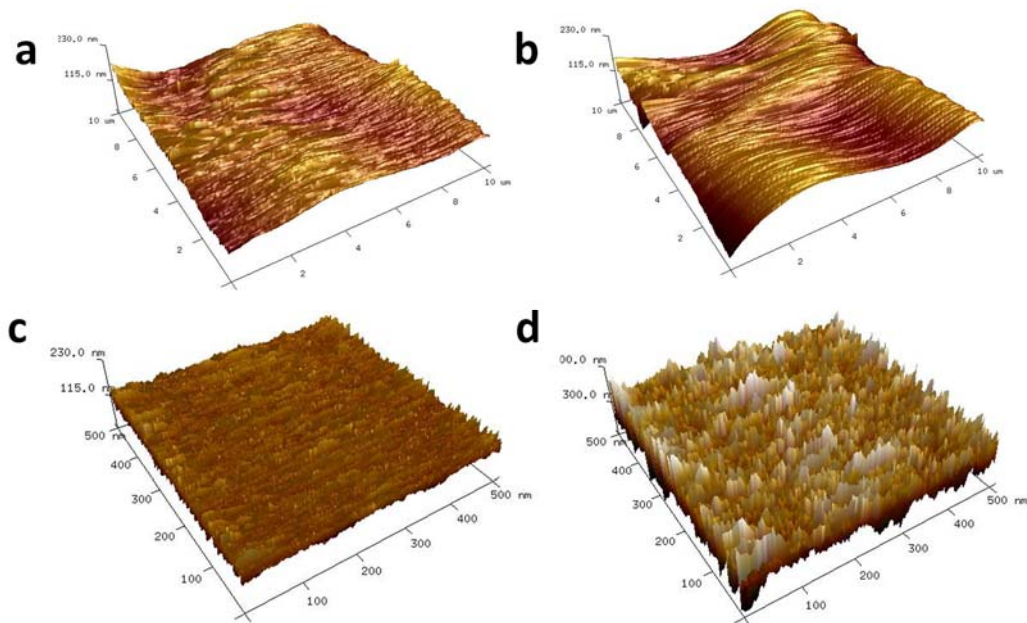

**Supplementary Figure 14 | AFM analysis.** AFM images for PIC hydrogel at (a) 25 °C and (b) 37 °C, and for the PIC/PNIPAM hydrogel (4/17 mg mL<sup>-1</sup>) at (c) 25 °C and (d) 37 °C. The roughness of PIC hydrogel is almost invariable with temperature, while for the hybrid gel the roughness increases from 12 to 80 nm with LCST (note the change in z-scale).
